# Supplementary material for: Bifidobacterium breve with α-linolenic acid alters the composition, distribution and transcription factor activity associated with metabolism and absorption of fat
Source: PubMed Central journal article supplement (PMC5339701; doi:10.1038/srep43300), 2017-03-07
Supplement: srep43300-s1.pdf [file srep43300-s1.pdf]

***Bifidobacterium breve* with  $\alpha$ -linolenic acid alters the composition, distribution and transcription factor activity associated with metabolism and absorption of fat.**

Elaine Patterson<sup>1,2</sup>, Rebecca Wall<sup>1,2</sup>, Sara Lisai<sup>3</sup>, R. Paul Ross<sup>1</sup>, Timothy G. Dinan<sup>1,4</sup>, John F. Cryan<sup>1,5</sup>, Gerald F. Fitzgerald<sup>1,6</sup>, Sebastiano Banni<sup>3</sup>, Eamonn M. Quigley<sup>1</sup>, Fergus Shanahan<sup>1</sup>, and Catherine Stanton<sup>1,2\*</sup>.

<sup>1</sup>APC Microbiome Institute, Biosciences Building, University College Cork, Cork, Ireland

<sup>2</sup>Teagasc Food Research Centre, Food Biosciences Department, Moorepark, Fermoy, Cork, Ireland

<sup>3</sup>Department of Biomedical Sciences, University of Cagliari, Monserrato, CA 09042, Italy

<sup>4</sup>Department of Psychiatry and Neurobehavioural Science, University College Cork, Cork, Ireland

<sup>5</sup>Department of Anatomy and Neuroscience, University College Cork, Cork, Ireland

<sup>6</sup>School of Microbiology, University College Cork, Cork, Ireland

\*Corresponding author:

Prof. Catherine Stanton,

Teagasc Food Research Centre,

Food Biosciences Department,

Moorepark, Fermoy, Cork, Ireland.

E-mail: [catherine.stanton@teagasc.ie](mailto:catherine.stanton@teagasc.ie)

Tel: +353-25-42606

**SUPPLEMENTARY TABLE 1** Endocannabinoid levels (%mol) in the liver and epididymal adipose tissue of mice fed an ALA enriched diet either alone or in combination with *Bifidobacterium breve* NCIMB 702258 or *B. breve* DPC 6330 or an unsupplemented diet for 6 weeks.

| Endocannabinoids and Congeners   | CON                    |       | ALA-CON                |       | ALA+ NCIMB 702258      |      | ALA+ DPC 6330          |       |
|----------------------------------|------------------------|-------|------------------------|-------|------------------------|------|------------------------|-------|
|                                  | <i>n</i> = 9           |       | <i>n</i> = 9           |       | <i>n</i> = 8           |      | <i>n</i> = 9           |       |
|                                  | <i>mol %</i><br>* 1000 |       | <i>mol %</i><br>* 1000 |       | <i>mol %</i><br>* 1000 |      | <i>mol %</i><br>* 1000 |       |
|                                  | Mean                   | SD    | Mean                   | SD    | Mean                   | SD   | Mean                   | SD    |
| <b>Liver</b>                     |                        |       |                        |       |                        |      |                        |       |
| AEA                              | 2.9 <sup>a</sup>       | 0.87  | 1.64 <sup>b</sup>      | 0.39  | 0.65 <sup>c</sup>      | 0.21 | 1.09 <sup>c</sup>      | 0.47  |
| PEA                              | 12.58 <sup>a</sup>     | 4.89  | 32.2 <sup>b</sup>      | 15.58 | 7.37 <sup>c</sup>      | 2.29 | 7.52 <sup>c</sup>      | 3.12  |
| OEA                              | 12.66 <sup>a</sup>     | 3.00  | 7.39 <sup>b</sup>      | 2.57  | 5.63 <sup>b</sup>      | 1.41 | 3.68 <sup>c</sup>      | 0.99  |
| 2AG                              | 74.07 <sup>a</sup>     | 23.45 | 30.18 <sup>b</sup>     | 19.29 | 20.31 <sup>b</sup>     | 9.69 | 24.62 <sup>b</sup>     | 12.67 |
| DHEA                             | 3.12                   | 2.47  | 1.54                   | 1.18  | 0.67                   | 0.37 | 2.50                   | 1.97  |
| <b>Epididymal Adipose Tissue</b> |                        |       |                        |       |                        |      |                        |       |
| AEA                              | 2.72 <sup>a</sup>      | 0.40  | 2.34 <sup>a</sup>      | 0.65  | 7.94 <sup>b</sup>      | 1.33 | 7.27 <sup>b</sup>      | 2.60  |
| PEA                              | 0.46 <sup>a</sup>      | 0.18  | 0.38 <sup>a</sup>      | 0.12  | 1.16 <sup>b</sup>      | 0.51 | 0.51 <sup>a</sup>      | 0.17  |
| OEA                              | 1.00 <sup>a</sup>      | 0.41  | 0.99 <sup>a</sup>      | 0.35  | 1.87 <sup>b</sup>      | 0.82 | 1.02 <sup>a</sup>      | 0.47  |
| 2AG                              | 3.84                   | 1.77  | 2.42                   | 1.37  | 6.35                   | 4.86 | 3.66                   | 2.72  |
| DHEA                             | 0.16 <sup>a</sup>      | 0.02  | 0.13 <sup>a</sup>      | 0.06  | 0.40 <sup>b</sup>      | 0.24 | 0.25 <sup>b</sup>      | 0.09  |

AEA, N-arachidonylethanolamide; PEA, N-palmitoylethanolamide; OEA, oleoylethanolamide; 2AG, 2-arachidonoylglycerol; DHEA, docosahexaenoylethanolamide.

<sup>a,b,c</sup> Mean values within a row with unlike superscript letters were significantly different ( $P < 0.05$  ANOVA followed by *post hoc* Tukey's multiple comparison test).
